# Supplementary material
Source: PubMed Central journal article supplement (PMC3276671)
Supplement: mmc1.pdf [file mmc1.pdf]

The American Journal of Human Genetics, Volume 90

**Supplementary Data**

**Haploinsufficiency of a Spliceosomal GTPase**

**Encoded by *EFTUD2* Causes Mandibulofacial**

**Dysostosis with Microcephaly**

**Matthew A. Lines, Lijia Huang, Jeremy Schwartzentruber, Stuart Douglas, Danielle C. Lynch, Chandree Beaulieu, Maria Leine Guion-Almeida, Roseli Maria Zechi-Ceide, Blanca Gener, Gabriele Gillessen-Kaesbach, Caroline Nava, Geneviève Baujat, Denise Horn, Usha Kini, Almuth Caliebe, Yasemin Alanay, Gulen Eda Utine, Dorit Lev, Jürgen Kohlhase, Arthur W. Grix, Dietmar R. Lohmann, Ute Hehr, Detlef Böhm, FORGE Canada Consortium, Jacek Majewski, Dennis E. Bulman, Dagmar Wiczorek, and Kym M. Boycott**

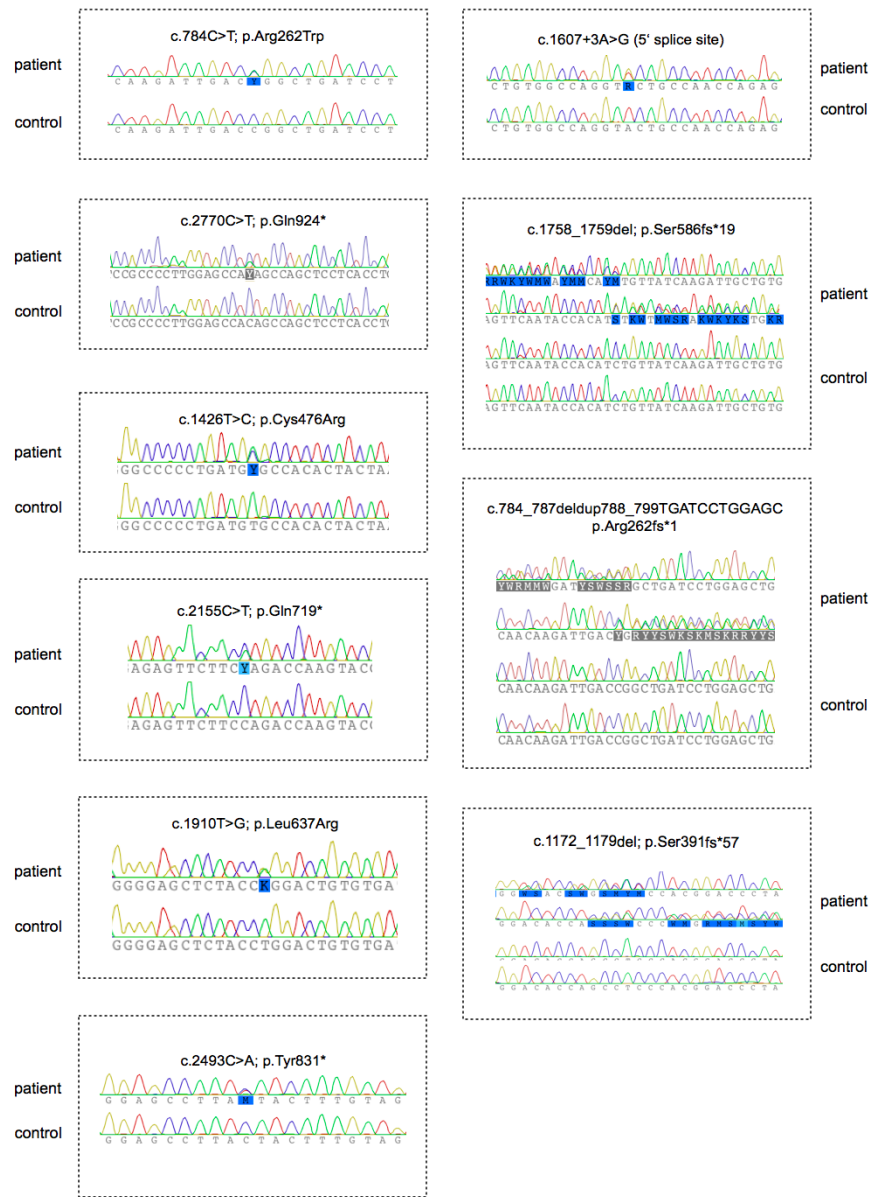

Figure S1. Chromatograms Demonstrating Mutations in *EFTUD2*

Chromatograms demonstrating MFDM-causing mutations (Table 3) are depicted above. All mutations were confirmed by bidirectional Sanger sequencing.

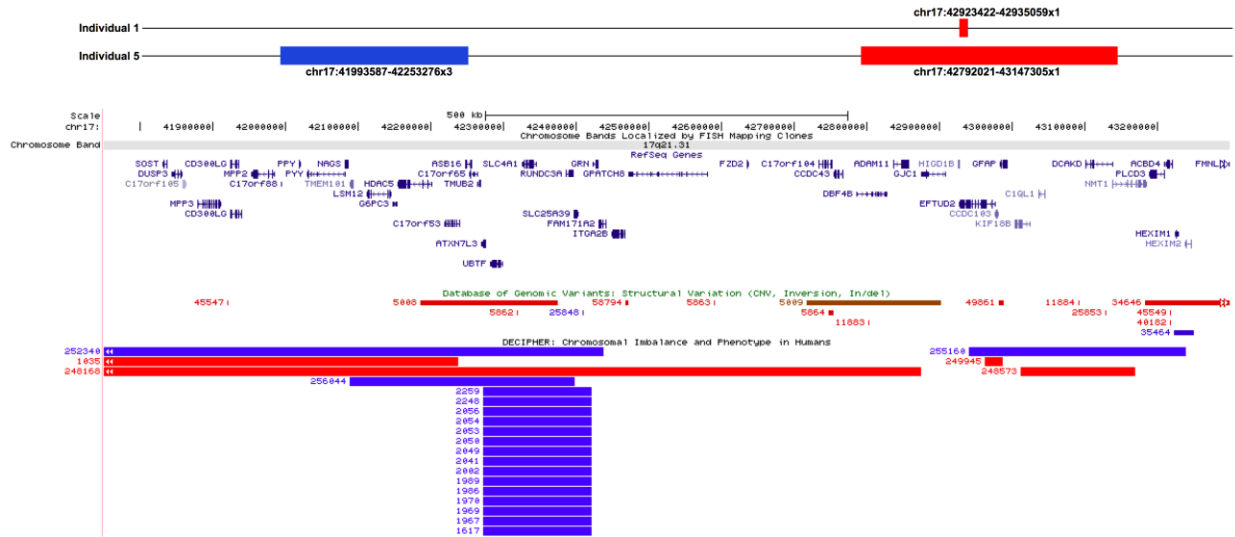

Figure S2. Chromosomal Rearrangements Identified in Individuals with MFDM

Image adapted from UCSC genome browser (hg19) showing microdeletions (red) and microduplications (blue) in probands 1 and 5. Also shown are benign copy number variants from the Database of Genomic Variants and potentially pathogenic rearrangements from DECIPHER (see Web Resources). The small partial deletion in individual 1 involves only *EFTUD2* and a single neighbouring gene, *HIGD1B*. The complex rearrangement in individual 5 includes a 17q21.31 microdeletion (involving eleven genes, including *EFTUD2*), a microduplication of a further ten genes within a distinct but adjacent interval on 17q21.31, and an agenic deletion at 4q12 (59109311-59427079; not depicted). Apart from the presence of VSD, this individual's phenotype otherwise resembles that of patients with *EFTUD2* point mutations.

Table S1. Primers for *EFTUD2* Amplification and Sequencing

| Name                   | Forward                    | Reverse                  |
|------------------------|----------------------------|--------------------------|
| EFTUD2_ex1 (noncoding) | GTGATCTGCCCGAAGGC          | GCATATAAGGCCCTTCCAG      |
| EFTUD2_ex2             | AGGCATGTGAAAGGGGTATG       | TCACTTAAGCCCAGGAGGTG     |
| EFTUD2_ex3             | GTCAGTGCTGTCACTCACGG       | GAACTTTTAAGGTTTGCTGAGAGC |
| EFTUD2_ex4             | TGAAAGGTCAGTCTAATGGAATAGTG | GCCAAAAGCCACCTCTTATC     |
| EFTUD2_ex5             | GCCTGAGCACTCTCCAGTTG       | CACCCCTAGTCAGGAGGTG      |
| EFTUD2_ex6             | ATGTGGTGTATTGGGAGCTG       | AGGAAGGGTGAAGGAAGGAG     |
| EFTUD2_ex7             | TGAGGGAAAGTGATTGATGG       | AAAGGCTCCTCTACATTCCC     |
| EFTUD2_ex8             | TTACTAGCAACTGGGGAGCC       | AAAGATGCACTGCTCCGTTT     |
| EFTUD2_ex9             | CCCTCAGTTCACCCTACCAG       | GTGCTCTGGGTATTGTTGCG     |
| EFTUD2_ex10            | GCCTTCITTGGTTCTGCTTTG      | AATCACAGTTGTTCCCAGAGG    |
| EFTUD2_ex11            | GGAGAGTGGCTGTGATACCG       | AGTCATTGAGCAGGAAAGGC     |
| EFTUD2_ex12            | AAGGAACTGCCTGGACCC         | TAGGGGAGGAAAGACGGTAG     |
| EFTUD2_ex13            | TGGAAACTTTACAGTCACAC       | TTAGTGACCAACAACCACCC     |
| EFTUD2_ex14            | TCCCTGTCTCCCTCTAGC         | AGATTTCTGACCTCCATCGC     |
| EFTUD2_ex15            | TGGCTCAGTAACTCCTGCTC       | TGGGAAAGTGGGCATTACTC     |
| EFTUD2_ex16            | GAGCTCATGTCCTTGCTGTC       | TCACTCCTTCCAGTCCTTG      |
| EFTUD2_ex17            | GGGAATGCTCTGCCTAAGTTT      | AGGACATGGCAATGACTGTG     |
| EFTUD2_ex18            | TGATCCTAAGCAAGTCCTCTTC     | GAAGCGGTGTGCAGCTC        |
| EFTUD2_ex19            | TGGCCTTGATTTTGTGTTGTG      | CCAGGAATTCAAGGATTTGG     |
| EFTUD2_ex20            | AGGCAGTTGGGGTTTTCAC        | GTGCATAGTGCTCATGGTGG     |
| EFTUD2_ex21_22         | AGCTGTCCGCTCTTGTTACCC      | CTTTTGGGAAAAGAACAACCTTG  |
| EFTUD2_ex23            | AGGCACATCTGTCTTCTCCC       | AATCCTAAAGATGGTGAGCCC    |
| EFTUD2_ex24_25         | AGCTGCAGTGTTCAGGAG         | TGTAGGAGCCGAGGTGACTC     |
| EFTUD2_ex26            | GCTGGAATGCATTTGGGG         | GATCAGGACAGAAGGGGATG     |
| EFTUD2_ex27            | AGAAGAGTCTGCTTCTGGG        | GGGCCAAAAGAAAGAGAGAG     |
| EFTUD2_ex28            | AGGTCTTGGATAGTCTCCTTGC     | AATTAAGGAGGAGGCGGC       |
